# Supplementary material for: Repeat Expansions in a Chilean Cohort With Adult-Onset Cerebellar Ataxia
Source: Research Square preprint supplement (doi:10.21203/rs.3.rs-7103872/v1), 2025-07-25
Supplement: Supplementary file 1 [file e91013b5894712cf4ad16a46.docx]

Supplementary Figure 1

Southern blotting of genomic DNA from 4 individuals with confirmed biallelic expansions (41, 41-2, 41-3, 50), three failed (54, 58, 61), and one confirmed negative (65)


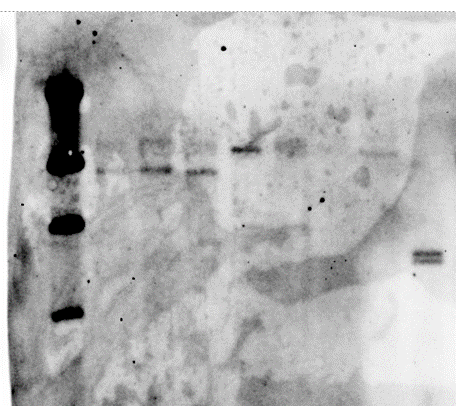


41

**41-2**

**41-3**

50

54

58

61

65
